# Supplementary material for: The ecology of the Drosophila-yeast mutualism in wineries
Source: PubMed Central journal article supplement (PMC5955509; doi:10.1371/journal.pone.0196440), 2018-05-16
Supplement: pone.0196440.s007.pdf [file pone.0196440.s007.pdf]

|                                           | <b>2015 total<br/>reads</b> | <b>2016 total<br/>reads</b> | <b>Total<br/>OTUs</b> | <b>% original<br/>reads<br/>retained</b> |
|-------------------------------------------|-----------------------------|-----------------------------|-----------------------|------------------------------------------|
| <b>Raw sequences</b>                      | 8724595                     | 15570284                    | --                    | --                                       |
| <b>After merging pairs</b>                | 8034126                     | 14261774                    | --                    | 91.77%                                   |
| <b>After demultiplexing</b>               | 5389671                     | 7311698                     | --                    | 52.28%                                   |
|                                           | <u>Combined total reads</u> |                             |                       |                                          |
| <b>Removal of resequenced control</b>     | 12037090                    |                             | --                    | 49.55%                                   |
| <b>After quality filtering</b>            | 11302418                    |                             | --                    | 46.52%                                   |
| <b>After chimera filtering</b>            | 11293777                    |                             | 6159                  | 46.49%                                   |
| <b>Post OTU picking quality filtering</b> | 7609820                     |                             | 399                   | 31.32%                                   |
| <b>Final sequence count</b>               | 7609820                     |                             | 399                   | 31.32%                                   |
