# Supplementary material for: The ecology of the Drosophila-yeast mutualism in wineries
Source: PubMed Central journal article supplement (PMC5955509; doi:10.1371/journal.pone.0196440), 2018-05-16
Supplement: pone.0196440.s008.pdf [file pone.0196440.s008.pdf]

| <b>Vineyard</b> | <b>Year Collected</b> | <b>PCR plate name</b> | <b>mean richness</b> | <b>SE</b> | <b>No. samples</b> |
|-----------------|-----------------------|-----------------------|----------------------|-----------|--------------------|
| HLD1            | 2015                  | L15                   | 31.502               | 9.516     | 84                 |
| SCM             | 2015                  | M15                   | 33.253               | 17.22     | 74                 |
| HLD1            | 2016                  | L16                   | 39.771               | 10.537    | 41                 |
| HLD1            | 2016                  | LF16                  | 28.8                 | NA        | 1                  |
| SCM             | 2016                  | M16                   | 33.953               | 7.672     | 47                 |
| SCM             | 2016                  | LF16                  | 23.15                | 2.55      | 2                  |
| HLD2            | 2016                  | D16                   | 19.741               | 7.673     | 54                 |
| HLD2            | 2016                  | LF16                  | 25.9                 | 5.193     | 10                 |
| EBO             | 2016                  | O16                   | 22.027               | 7.209     | 44                 |
