# Supplementary material for: The ecology of the Drosophila-yeast mutualism in wineries
Source: PubMed Central journal article supplement (PMC5955509; doi:10.1371/journal.pone.0196440), 2018-05-16
Supplement: pone.0196440.s009.pdf [file pone.0196440.s009.pdf]

| Yeast Isolate: C1** |       |       |         |     |
|---------------------|-------|-------|---------|-----|
|                     | FermA | FermB | CellarA | PPA |
| FermA               | -     | **    | ns      | ns  |
| FermB               | -     | -     | ns      | *   |
| CellarA             | -     | -     | -       | ns  |
| PPA                 | -     | -     | -       | -   |

| Yeast Isolate: F1** |       |       |         |     |
|---------------------|-------|-------|---------|-----|
|                     | FermA | FermB | CellarA | PPA |
| FermA               | -     | *     | *       | ns  |
| FermB               | -     | -     | ns      | ns  |
| CellarA             | -     | -     | -       | ns  |
| PPA                 | -     | -     | -       | -   |

| Yeast Isolate: P1**** |       |       |         |     |
|-----------------------|-------|-------|---------|-----|
|                       | FermA | FermB | CellarA | PPA |
| FermA                 | -     | ****  | ns      | ns  |
| FermB                 | -     | -     | ***     | **  |
| CellarA               | -     | -     | -       | ns  |
| PPA                   | -     | -     | -       | -   |

| Yeast Isolate: P2** |       |       |         |     |
|---------------------|-------|-------|---------|-----|
|                     | FermA | FermB | CellarA | PPA |
| FermA               | -     | ns    | **      | ns  |
| FermB               | -     | -     | ns      | ns  |
| CellarA             | -     | -     | -       | ns  |
| PPA                 | -     | -     | -       | -   |

| Yeast Isolate: CTLsc*** |       |       |         |     |
|-------------------------|-------|-------|---------|-----|
|                         | FermA | FermB | CellarA | PPA |
| FermA                   | -     | ***   | ns      | ns  |
| FermB                   | -     | -     | **      | *   |
| CellarA                 | -     | -     | -       | ns  |
| PPA                     | -     | -     | -       | -   |

| Yeast Isolate: CTLns**** |       |       |         |     |
|--------------------------|-------|-------|---------|-----|
|                          | FermA | FermB | CellarA | PPA |
| FermA                    | -     | ****  | ns      | ns  |
| FermB                    | -     | -     | ***     | *** |
| CellarA                  | -     | -     | -       | ns  |
| PPA                      | -     | -     | -       | -   |
