# Supplementary material for: The ecology of the Drosophila-yeast mutualism in wineries
Source: PubMed Central journal article supplement (PMC5955509; doi:10.1371/journal.pone.0196440), 2018-05-16
Supplement: pone.0196440.s010.pdf [file pone.0196440.s010.pdf]

Yeast treatment

| Fly Line       | ANOVA | Yeast treatment |        |        |        |        |        | no yeast | Dead yeast, cornmeal media |
|----------------|-------|-----------------|--------|--------|--------|--------|--------|----------|----------------------------|
|                |       | C1              | F1     | P1     | P2     | CTLsc  | CTLns  |          |                            |
| <b>FermA</b>   | ****  | 88.9%           | 100.0% | 100.0% | 100.0% | 100.0% | 97.8%  | 0.0%     | 94.4%                      |
| <b>FermB</b>   | ****  | 88.9%           | 100.0% | 93.3%  | 82.2%  | 88.9%  | 100.0% | 0.0%     | 93.3%                      |
| <b>CellarA</b> | ****  | 64.4%           | 100.0% | 91.1%  | 93.3%  | 88.9%  | 95.6%  | 0.0%     | 96.7%                      |
| <b>PPA</b>     | ****  | 80.0%           | 91.1%  | 91.1%  | 93.3%  | 86.7%  | 84.4%  | 20.0%    | 67.8%                      |
