# Supplementary material for: The ecology of the Drosophila-yeast mutualism in wineries
Source: PubMed Central journal article supplement (PMC5955509; doi:10.1371/journal.pone.0196440), 2018-05-16
Supplement: pone.0196440.s011.pdf [file pone.0196440.s011.pdf]

| <b>FermA</b> | C1 | F1   | P1   | P2   | CTLsc | CTLns |
|--------------|----|------|------|------|-------|-------|
| C1           | -  | **** | **** | **** | ****  | ****  |
| F1           | -  | -    | ns   | ns   | ns    | ns    |
| P1           | -  | -    | -    | ns   | ns    | ns    |
| P2           | -  | -    | -    | -    | ns    | ns    |
| CTLsc        | -  | -    | -    | -    | -     | ns    |
| CTLns        | -  | -    | -    | -    | -     | -     |

| <b>FermB</b> | C1 | F1   | P1   | P2   | CTLsc | CTLns |
|--------------|----|------|------|------|-------|-------|
| C1           | -  | **** | **** | **** | ****  | ****  |
| F1           | -  | -    | ns   | ns   | ns    | ns    |
| P1           | -  | -    | -    | ns   | ns    | ns    |
| P2           | -  | -    | -    | -    | ns    | ns    |
| CTLsc        | -  | -    | -    | -    | -     | ns    |
| CTLns        | -  | -    | -    | -    | -     | -     |

| <b>CellarA</b> | C1 | F1   | P1   | P2   | CTLsc | CTLns |
|----------------|----|------|------|------|-------|-------|
| C1             | -  | **** | **** | **** | ****  | ****  |
| F1             | -  | -    | ns   | ns   | ns    | ns    |
| P1             | -  | -    | -    | ns   | ns    | ns    |
| P2             | -  | -    | -    | -    | ns    | ns    |
| CTLsc          | -  | -    | -    | -    | -     | ns    |
| CTLns          | -  | -    | -    | -    | -     | -     |

| <b>PPA</b> | C1 | F1   | P1   | P2   | CTLsc | CTLns |
|------------|----|------|------|------|-------|-------|
| C1         | -  | **** | **** | **** | ****  | ****  |
| F1         | -  | -    | ns   | ns   | ns    | ns    |
| P1         | -  | -    | -    | ns   | ns    | ns    |
| P2         | -  | -    | -    | -    | ns    | ns    |
| CTLsc      | -  | -    | -    | -    | -     | ns    |
| CTLns      | -  | -    | -    | -    | -     | -     |
