# Supplementary material for: The ecology of the Drosophila-yeast mutualism in wineries
Source: PubMed Central journal article supplement (PMC5955509; doi:10.1371/journal.pone.0196440), 2018-05-16
Supplement: pone.0196440.s012.pdf [file pone.0196440.s012.pdf]

|         | FermA | FermB | CellarA | PPA |
|---------|-------|-------|---------|-----|
| FermA   | -     | *     | *       | ns  |
| FermB   | -     | -     | ns      | *** |
| CellarA | -     | -     | -       | **  |
| PPA     | -     | -     | -       | -   |
